# Supplementary material for: Atmospheric implication of the hydrogen bonding interaction in hydrated clusters of HONO and dimethylamine in the nighttime
Source: Royal Society of Chemistry journal article supplement (doi:10.1039/c6em00598e), 2016-12-01
Supplement: c6em00598e1.pdf [file c6em00598e1.pdf]

## Supplementary information

# Atmospheric Implication of the Hydrogen Bonding Interaction in Hydrated Clusters of HONO and Dimethylamine in the Nighttime

Hailiang Zhao and Lin Du\*

*Environment Research Institute, Shandong University, Shanda South Road 27, 250100  
Shandong, China. E-mail: lindu@sdu.edu.cn; Fax: +86 531 8836 6072; Tel: +86 531  
8836 6072*

**Table S1** B3LYP-D3/aug-cc-pVTZ optimized cartesian coordinates (Å), zero point correction and total energy of H<sub>2</sub>O–HONO (A).

|                       |                   |           |           |
|-----------------------|-------------------|-----------|-----------|
| O                     | -2.856564         | -0.198268 | 0.000018  |
| H                     | -3.345315         | 0.629432  | -0.000117 |
| H                     | -1.927138         | 0.057505  | 0.000002  |
| N                     | 0.899892          | -0.433405 | -0.000019 |
| O                     | 2.242941          | -0.131191 | 0.000004  |
| H                     | 2.315894          | 0.846265  | 0.000036  |
| O                     | 0.195788          | 0.517039  | 0.000004  |
| Total energy:         | -282.2607891 a.u. |           |           |
| Zero point correction | 0.042948 a.u.     |           |           |

**Table S2** B3LYP-D3/aug-cc-pVTZ optimized cartesian coordinates (Å), zero point correction and total energy of H<sub>2</sub>O–HONO (B).

|                       |                   |           |           |
|-----------------------|-------------------|-----------|-----------|
| O                     | 2.897117          | 0.006514  | -0.000013 |
| H                     | 3.030251          | -0.945510 | 0.000023  |
| H                     | 1.940788          | 0.127085  | 0.000006  |
| N                     | -0.901028         | -0.438469 | 0.000013  |
| O                     | -2.244214         | -0.136610 | -0.000015 |
| H                     | -2.316918         | 0.840950  | -0.000026 |
| O                     | -0.196268         | 0.510941  | 0.000016  |
| Total energy:         | -282.2609686 a.u. |           |           |
| Zero point correction | 0.043054 a.u.     |           |           |

**Table S3** B3LYP-D3/aug-cc-pVTZ optimized cartesian coordinates (Å), zero point correction and total energy of H<sub>2</sub>O–HONO (C).

|                       |                   |           |           |
|-----------------------|-------------------|-----------|-----------|
| O                     | 2.627487          | 0.103976  | 0.000003  |
| H                     | 2.893412          | -0.819808 | -0.000022 |
| H                     | 1.663111          | 0.088715  | 0.000002  |
| N                     | -0.553458         | 0.169979  | 0.000001  |
| O                     | -1.125128         | -1.095907 | 0.000001  |
| H                     | -2.095853         | -0.967029 | -0.000001 |
| O                     | -1.325668         | 1.055464  | -0.000002 |
| Total energy:         | -282.2610338 a.u. |           |           |
| Zero point correction | 0.043159 a.u.     |           |           |

**Table S4** B3LYP-D3/aug-cc-pVTZ optimized cartesian coordinates (Å), zero point correction and total energy of H<sub>2</sub>O–HONO (D).

|                       |                   |           |           |
|-----------------------|-------------------|-----------|-----------|
| O                     | -2.627732         | -0.143203 | -0.000014 |
| H                     | -2.976132         | 0.752724  | 0.000083  |
| H                     | -1.668545         | -0.041596 | 0.000013  |
| N                     | 0.544920          | 0.143185  | 0.000013  |
| O                     | 1.222812          | -1.061141 | 0.000002  |
| H                     | 2.178824          | -0.847414 | -0.000023 |
| O                     | 1.236346          | 1.096094  | -0.000009 |
| Total energy:         | -282.2609246 a.u. |           |           |
| Zero point correction | 0.043193a.u.      |           |           |

**Table S5** B3LYP-D3/aug-cc-pVTZ optimized cartesian coordinates (Å), zero point correction and total energy of H<sub>2</sub>O–HONO (E).

|                       |                   |           |           |
|-----------------------|-------------------|-----------|-----------|
| O                     | -2.822761         | -0.252871 | -0.000031 |
| H                     | -3.406084         | 0.511167  | -0.000021 |
| H                     | -1.930195         | 0.111191  | 0.000026  |
| N                     | 0.854622          | -0.353441 | 0.000082  |
| O                     | 2.225145          | -0.011129 | -0.000069 |
| H                     | 2.665185          | -0.874610 | -0.000009 |
| O                     | 0.183708          | 0.604793  | 0.000028  |
| Total energy:         | -282.2622332 a.u. |           |           |
| Zero point correction | 0.043237 a.u.     |           |           |

**Table S6** B3LYP-D3/aug-cc-pVTZ optimized cartesian coordinates (Å), zero point correction and total energy of H<sub>2</sub>O–HONO (F).

|                       |                   |           |           |
|-----------------------|-------------------|-----------|-----------|
| O                     | -2.545750         | -0.221830 | -0.148697 |
| H                     | -1.641703         | -0.096237 | 0.164594  |
| H                     | -2.958042         | -0.810820 | 0.489176  |
| N                     | 1.433927          | 0.208710  | -0.312586 |
| O                     | 0.237867          | 0.802160  | 0.256296  |
| H                     | 0.188390          | 1.664372  | -0.182990 |
| O                     | 1.604616          | -0.857615 | 0.107066  |
| Total energy:         | -282.2636615 a.u. |           |           |
| Zero point correction | 0.043160 a.u.     |           |           |

**Table S7** B3LYP-D3/aug-cc-pVTZ optimized cartesian coordinates (Å), zero point correction and total energy of HONO–H<sub>2</sub>O (G).

|                       |                   |           |           |
|-----------------------|-------------------|-----------|-----------|
| O                     | -1.973336         | -0.047026 | -0.084661 |
| H                     | -1.624560         | -0.941863 | 0.012528  |
| H                     | -2.680599         | 0.043522  | 0.561571  |
| N                     | 1.371945          | 0.006692  | 0.018811  |
| O                     | 0.550455          | 1.097234  | -0.001947 |
| H                     | -0.393185         | 0.780107  | -0.022910 |
| O                     | 0.809721          | -1.041284 | 0.001250  |
| Total energy:         | -282.2701629 a.u. |           |           |
| Zero point correction | 0.044611 a.u.     |           |           |

**Table S8** B3LYP-D3/aug-cc-pVTZ optimized cartesian coordinates (Å), zero point correction and total energy of HONO–H<sub>2</sub>O (H).

|                       |                   |           |           |
|-----------------------|-------------------|-----------|-----------|
| O                     | -2.348261         | -0.167071 | -0.067888 |
| H                     | -2.248059         | -1.123779 | -0.119016 |
| H                     | -2.957271         | -0.003501 | 0.659213  |
| N                     | 0.894338          | -0.388781 | 0.001261  |
| O                     | 0.242708          | 0.845683  | -0.021027 |
| H                     | -0.705795         | 0.587237  | -0.037890 |
| O                     | 2.061897          | -0.270924 | 0.025023  |
| Total energy:         | -282.2707417 a.u. |           |           |
| Zero point correction | 0.044310 a.u.     |           |           |

**Table S9** B3LYP-D3/aug-cc-pVTZ optimized cartesian coordinates (Å), zero point correction and total energy of DMA–HONO (A).

|                       |                   |           |           |
|-----------------------|-------------------|-----------|-----------|
| O                     | 1.776056          | 1.025473  | -0.355430 |
| H                     | 1.617142          | 1.768511  | 0.245005  |
| O                     | 1.725829          | -1.106161 | -0.108085 |
| N                     | 1.576972          | -0.116252 | 0.488049  |
| N                     | -1.583559         | -0.055747 | 0.573267  |
| H                     | -0.811338         | -0.073420 | 1.225605  |
| C                     | -1.644870         | 1.216533  | -0.127606 |
| H                     | -1.627085         | 2.035591  | 0.592341  |
| H                     | -0.827546         | 1.365413  | -0.850056 |
| H                     | -2.586163         | 1.281661  | -0.677059 |
| C                     | -1.539160         | -1.209395 | -0.309906 |
| H                     | -0.706877         | -1.186285 | -1.030685 |
| H                     | -1.454184         | -2.121929 | 0.278961  |
| H                     | -2.468749         | -1.262867 | -0.880128 |
| Total energy:         | -341.0224247 a.u. |           |           |
| Zero point correction | 0.113480 a.u.     |           |           |

**Table S10** B3LYP-D3/aug-cc-pVTZ optimized cartesian coordinates (Å), zero point correction and total energy of DMA–HONO (B).

|                       |                   |           |           |
|-----------------------|-------------------|-----------|-----------|
| O                     | -2.170654         | 0.790050  | -0.475148 |
| H                     | -2.551660         | 0.659556  | -1.355994 |
| O                     | -1.303046         | -0.543187 | 0.963207  |
| N                     | -1.790676         | -0.536139 | -0.095247 |
| N                     | 1.773868          | -0.150805 | 0.457972  |
| H                     | 1.108436          | -0.377761 | 1.184328  |
| C                     | 1.588782          | -1.026425 | -0.685130 |
| H                     | 1.601188          | -2.067126 | -0.362303 |
| H                     | 0.649233          | -0.849354 | -1.235879 |
| H                     | 2.410463          | -0.883337 | -1.390169 |
| C                     | 1.686301          | 1.262926  | 0.121105  |
| H                     | 0.750312          | 1.539298  | -0.387389 |
| H                     | 1.773521          | 1.863658  | 1.026033  |
| H                     | 2.515273          | 1.529772  | -0.538034 |
| Total energy:         | -341.0220537 a.u. |           |           |
| Zero point correction | 0.113180 a.u.     |           |           |

**Table S11** B3LYP-D3/aug-cc-pVTZ optimized cartesian coordinates (Å), zero point correction and total energy of DMA–HONO (C).

|                       |                   |           |           |
|-----------------------|-------------------|-----------|-----------|
| O                     | 1.840273          | -1.113475 | 0.355738  |
| H                     | 1.815494          | -1.852726 | -0.269097 |
| O                     | 1.894342          | 1.018778  | 0.089215  |
| N                     | 1.903555          | 0.028862  | -0.520565 |
| N                     | -1.189473         | -0.104308 | -0.047771 |
| H                     | -0.576305         | -0.398900 | 0.701003  |
| C                     | -2.363582         | -0.962800 | -0.099133 |
| H                     | -2.056571         | -2.007634 | -0.152153 |
| H                     | -3.038706         | -0.844456 | 0.763024  |
| H                     | -2.938334         | -0.738355 | -1.000104 |
| C                     | -1.516427         | 1.306722  | 0.099924  |
| H                     | -2.140989         | 1.526875  | 0.979717  |
| H                     | -0.600076         | 1.891178  | 0.175778  |
| H                     | -2.059954         | 1.646196  | -0.784184 |
| Total energy:         | -341.0226746 a.u. |           |           |
| Zero point correction | 0.113216 a.u.     |           |           |

**Table S12** B3LYP-D3/aug-cc-pVTZ optimized cartesian coordinates (Å), zero point correction and total energy of DMA–HONO (D).

|                       |                   |           |           |
|-----------------------|-------------------|-----------|-----------|
| O                     | -1.863379         | 0.702239  | -0.604220 |
| H                     | -2.302867         | 1.483666  | -0.237898 |
| O                     | -1.338613         | -1.211245 | 0.209605  |
| N                     | -1.862194         | -0.214434 | 0.501102  |
| N                     | 1.460700          | 0.278439  | -0.558811 |
| H                     | 0.579629          | 0.126809  | -1.031078 |
| C                     | 1.287801          | 1.237385  | 0.517696  |
| H                     | 0.834757          | 2.150230  | 0.131033  |
| H                     | 0.665417          | 0.868016  | 1.350856  |
| H                     | 2.263073          | 1.499326  | 0.933472  |
| C                     | 2.018468          | -0.990419 | -0.113921 |
| H                     | 1.451429          | -1.462618 | 0.703200  |
| H                     | 2.056852          | -1.688597 | -0.949634 |
| H                     | 3.040491          | -0.834614 | 0.238284  |
| Total energy:         | -341.0226824 a.u. |           |           |
| Zero point correction | 0.113264 a.u.     |           |           |

**Table S13** B3LYP-D3/aug-cc-pVTZ optimized cartesian coordinates (Å), zero point correction and total energy of DMA–HONO (E).

|                       |                   |           |           |
|-----------------------|-------------------|-----------|-----------|
| O                     | -1.956184         | 0.808859  | -0.375237 |
| H                     | -2.104631         | 1.036435  | 0.564817  |
| O                     | -1.408365         | -0.998832 | 0.674244  |
| N                     | -1.485995         | -0.506667 | -0.393124 |
| N                     | 1.502860          | 0.296312  | -0.563226 |
| H                     | 0.731661          | 0.233037  | -1.213488 |
| C                     | 1.218059          | 1.241490  | 0.498798  |
| H                     | 0.872035          | 2.183586  | 0.075864  |
| H                     | 0.463252          | 0.882532  | 1.220472  |
| H                     | 2.131215          | 1.440708  | 1.063471  |
| C                     | 1.892895          | -1.020137 | -0.085855 |
| H                     | 1.163390          | -1.472337 | 0.603473  |
| H                     | 2.029341          | -1.693740 | -0.931216 |
| H                     | 2.846351          | -0.946066 | 0.441342  |
| Total energy:         | -341.0219859 a.u. |           |           |
| Zero point correction | 0.113392 a.u.     |           |           |

**Table S14** B3LYP-D3/aug-cc-pVTZ optimized cartesian coordinates (Å), zero point correction and total energy of DMA–HONO (F).

|                       |                   |           |           |
|-----------------------|-------------------|-----------|-----------|
| O                     | -2.518308         | 0.594646  | -0.015022 |
| H                     | -2.427158         | 0.567788  | 0.959287  |
| O                     | -1.164291         | -1.052569 | 0.315109  |
| N                     | -1.724578         | -0.432218 | -0.516700 |
| N                     | 1.683048          | 0.198328  | 0.588769  |
| H                     | 0.956671          | -0.230075 | 1.146484  |
| C                     | 2.300767          | -0.800613 | -0.271642 |
| H                     | 2.631696          | -1.649154 | 0.326520  |
| H                     | 1.632670          | -1.173271 | -1.063087 |
| H                     | 3.179782          | -0.368463 | -0.754221 |
| C                     | 1.151716          | 1.333962  | -0.145201 |
| H                     | 0.447662          | 1.056923  | -0.946885 |
| H                     | 0.641975          | 2.014081  | 0.537798  |
| H                     | 1.973310          | 1.882691  | -0.610018 |
| Total energy:         | -341.0207222 a.u. |           |           |
| Zero point correction | 0.113153 a.u.     |           |           |

**Table S15** B3LYP-D3/aug-cc-pVTZ optimized cartesian coordinates (Å), zero point correction and total energy of HONO–DMA (G).

|                       |                   |           |           |
|-----------------------|-------------------|-----------|-----------|
| O                     | 1.132830          | -0.852321 | 0.107257  |
| H                     | 0.188869          | -0.554525 | -0.109732 |
| O                     | 3.034936          | 0.106609  | 0.074866  |
| N                     | 1.885727          | 0.276957  | -0.131722 |
| N                     | -1.393545         | 0.016516  | -0.406477 |
| H                     | -1.512633         | 0.073692  | -1.411024 |
| C                     | -2.384791         | -0.907564 | 0.151452  |
| H                     | -2.305859         | -1.873093 | -0.345993 |
| H                     | -2.176401         | -1.055310 | 1.211330  |
| H                     | -3.413213         | -0.540449 | 0.052604  |
| C                     | -1.471477         | 1.363207  | 0.169422  |
| H                     | -1.242503         | 1.307159  | 1.233798  |
| H                     | -0.725853         | 2.001993  | -0.300162 |
| H                     | -2.462199         | 1.818066  | 0.054338  |
| Total energy:         | -341.0391591 a.u. |           |           |
| Zero point correction | 0.114663 a.u.     |           |           |

**Table S16** B3LYP-D3/aug-cc-pVTZ optimized cartesian coordinates (Å), zero point correction and total energy of HONO–DMA (H).

|                       |                   |           |           |
|-----------------------|-------------------|-----------|-----------|
| O                     | -1.196106         | 0.000135  | 0.940327  |
| H                     | -0.188719         | 0.000092  | 0.829492  |
| O                     | -2.831708         | -0.000031 | -0.425269 |
| N                     | -1.653469         | -0.000054 | -0.358848 |
| N                     | 1.476738          | 0.000016  | 0.451112  |
| H                     | 2.040995          | 0.000046  | 1.292356  |
| C                     | 1.738831          | -1.222576 | -0.315775 |
| H                     | 1.569143          | -2.093140 | 0.316001  |
| H                     | 1.041444          | -1.269823 | -1.151869 |
| H                     | 2.759738          | -1.264586 | -0.712898 |
| C                     | 1.738905          | 1.222507  | -0.315910 |
| H                     | 1.041522          | 1.269704  | -1.152011 |
| H                     | 1.569270          | 2.093152  | 0.315768  |
| H                     | 2.759815          | 1.264411  | -0.713039 |
| Total energy:         | -341.0394833 a.u. |           |           |
| Zero point correction | 0.114818 a.u.     |           |           |

**Table S17** B3LYP-D3/aug-cc-pVTZ optimized cartesian coordinates (Å), zero point correction and total energy of HONO–DMA (I).

|                       |                  |           |           |
|-----------------------|------------------|-----------|-----------|
| O                     | 1.228318         | -1.043009 | 0.451952  |
| H                     | 0.342120         | -0.620996 | 0.130798  |
| O                     | 1.954389         | 0.744033  | -0.492632 |
| N                     | 2.264922         | -0.249103 | 0.093250  |
| N                     | -1.127311        | 0.047114  | -0.322296 |
| H                     | -0.981620        | 0.274699  | -1.299200 |
| C                     | -2.276290        | -0.850740 | -0.186397 |
| H                     | -2.128476        | -1.731003 | -0.810396 |
| H                     | -2.350957        | -1.179335 | 0.850462  |
| H                     | -3.224603        | -0.375306 | -0.463288 |
| C                     | -1.261614        | 1.288656  | 0.445546  |
| H                     | -1.320029        | 1.044883  | 1.506752  |
| H                     | -0.378299        | 1.903766  | 0.283967  |
| H                     | -2.155645        | 1.861516  | 0.174769  |
| Total energy:         | -341.037847 a.u. |           |           |
| Zero point correction | 0.114278 a.u.    |           |           |



**Table S18** B3LYP-D3/aug-cc-pVTZ optimized cartesian coordinates (Å), zero point correction and total energy of HONO–DMA (J).

|                       |                   |           |           |
|-----------------------|-------------------|-----------|-----------|
| O                     | -1.396033         | -0.000020 | -1.075418 |
| H                     | -0.388366         | -0.000013 | -0.843401 |
| O                     | -1.500665         | 0.000019  | 1.068995  |
| N                     | -2.135061         | -0.000002 | 0.056699  |
| N                     | 1.254214          | -0.000007 | -0.520564 |
| H                     | 1.794498          | -0.000017 | -1.377404 |
| C                     | 1.533322          | 1.222367  | 0.240584  |
| H                     | 1.359792          | 2.092613  | -0.390869 |
| H                     | 0.846833          | 1.269986  | 1.085222  |
| H                     | 2.560103          | 1.258330  | 0.621597  |
| C                     | 1.533329          | -1.222358 | 0.240618  |
| H                     | 0.846838          | -1.269958 | 1.085256  |
| H                     | 1.359804          | -2.092623 | -0.390811 |
| H                     | 2.560109          | -1.258305 | 0.621634  |
| Total energy:         | -341.0387203 a.u. |           |           |
| Zero point correction | 0.114558 a.u.     |           |           |

**Table S19** B3LYP-D3/aug-cc-pVTZ optimized cartesian coordinates (Å), zero point correction and total energy of HONO–DMA–H<sub>2</sub>O (A).

|                       |                   |           |           |
|-----------------------|-------------------|-----------|-----------|
| O                     | 1.499246          | 0.096984  | -0.493658 |
| H                     | 1.058333          | 0.904718  | -0.116616 |
| O                     | 3.344673          | -0.923060 | -0.181319 |
| N                     | 2.727011          | 0.016214  | 0.161265  |
| N                     | -1.679340         | -0.262228 | -0.147739 |
| H                     | -0.939677         | -0.679521 | -0.702602 |
| C                     | -1.786112         | -0.984251 | 1.122154  |
| H                     | -0.814259         | -0.997981 | 1.612746  |
| H                     | -2.488840         | -0.464084 | 1.773991  |
| H                     | -2.133830         | -2.017225 | 0.998089  |
| C                     | -2.926589         | -0.250895 | -0.910881 |
| H                     | -3.685209         | 0.301016  | -0.354257 |
| H                     | -2.770231         | 0.254070  | -1.863516 |
| H                     | -3.317713         | -1.256898 | -1.108876 |
| O                     | -0.180705         | 1.954374  | 0.449673  |
| H                     | -0.383569         | 2.771351  | -0.013412 |
| H                     | -0.888205         | 1.291140  | 0.214567  |
| Total energy:         | -417.5163687 a.u. |           |           |
| Zero point correction | 0.139265 a.u.     |           |           |

**Table S20** B3LYP-D3/aug-cc-pVTZ optimized cartesian coordinates (Å), zero point correction and total energy of HONO–DMA–H<sub>2</sub>O (B).

|                       |                  |           |           |
|-----------------------|------------------|-----------|-----------|
| O                     | 1.175040         | 0.076452  | -0.587401 |
| H                     | 0.175970         | -0.123353 | -0.403776 |
| O                     | 3.033770         | -0.710862 | 0.097870  |
| N                     | 1.865163         | -0.852537 | 0.166216  |
| N                     | -1.405936        | -0.168550 | -0.051719 |
| H                     | -1.619680        | 0.818875  | -0.149849 |
| C                     | -2.211206        | -0.961267 | -0.981721 |
| H                     | -2.065924        | -0.592439 | -1.996067 |
| H                     | -1.882682        | -2.000428 | -0.947085 |
| H                     | -3.281387        | -0.932964 | -0.745598 |
| C                     | -1.576301        | -0.562523 | 1.349680  |
| H                     | -1.200650        | -1.576494 | 1.487416  |
| H                     | -0.996133        | 0.106525  | 1.982545  |
| H                     | -2.623858        | -0.533825 | 1.670594  |
| O                     | -0.170514        | 2.580103  | 0.033854  |
| H                     | 0.612875         | 2.058753  | -0.190968 |
| H                     | 0.085553         | 3.500160  | -0.071028 |
| Total energy:         | -417.516985 a.u. |           |           |
| Zero point correction | 0.138070 a.u.    |           |           |

**Table S21** B3LYP-D3/aug-cc-pVTZ optimized cartesian coordinates (Å), zero point correction and total energy of HONO–DMA–H<sub>2</sub>O (C).

|                       |                  |           |           |
|-----------------------|------------------|-----------|-----------|
| O                     | 1.068762         | 0.906173  | -0.516036 |
| H                     | 0.264848         | 0.204894  | -0.395014 |
| O                     | 2.141691         | -0.695157 | 0.421119  |
| N                     | 2.221579         | 0.418841  | -0.000593 |
| N                     | -1.023294        | -0.607672 | -0.175513 |
| H                     | -1.763321        | 0.004529  | -0.500352 |
| C                     | -0.993093        | -1.857195 | -0.937604 |
| H                     | -0.944969        | -1.633935 | -2.002453 |
| H                     | -0.096757        | -2.413636 | -0.663409 |
| H                     | -1.867361        | -2.488415 | -0.746107 |
| C                     | -1.153166        | -0.805764 | 1.272023  |
| H                     | -0.255777        | -1.302228 | 1.640547  |
| H                     | -1.240019        | 0.166155  | 1.753406  |
| H                     | -2.025213        | -1.414202 | 1.532992  |
| O                     | -1.398323        | 2.359910  | -0.041749 |
| H                     | -0.443073        | 2.320801  | -0.187544 |
| H                     | -1.635829        | 3.288215  | -0.112508 |
| Total energy:         | -417.515765 a.u. |           |           |
| Zero point correction | 0.137360 a.u.    |           |           |

**Table S22** B3LYP-D3/aug-cc-pVTZ optimized cartesian coordinates (Å), zero point correction and total energy of HONO–DMA–H<sub>2</sub>O (D).

|                       |                   |           |           |
|-----------------------|-------------------|-----------|-----------|
| O                     | 2.287427          | 0.687987  | -0.005081 |
| H                     | 1.467583          | 1.261825  | -0.000569 |
| O                     | 2.646946          | -1.408914 | 0.000702  |
| N                     | 1.795025          | -0.591206 | 0.002562  |
| N                     | -1.482679         | -0.238657 | 0.010080  |
| H                     | -0.635563         | -0.797819 | 0.005667  |
| C                     | -2.280625         | -0.563158 | 1.191750  |
| H                     | -1.670715         | -0.449542 | 2.087339  |
| H                     | -3.122279         | 0.127464  | 1.262409  |
| H                     | -2.681717         | -1.584121 | 1.170283  |
| C                     | -2.205855         | -0.432750 | -1.247178 |
| H                     | -3.044718         | 0.262873  | -1.293178 |
| H                     | -1.543032         | -0.218833 | -2.084338 |
| H                     | -2.599851         | -1.450317 | -1.360521 |
| O                     | -0.004501         | 2.051783  | -0.026981 |
| H                     | -0.210515         | 2.685204  | 0.665379  |
| H                     | -0.665718         | 1.300911  | 0.042481  |
| Total energy:         | -417.5192978 a.u. |           |           |
| Zero point correction | 0.139652 a.u.     |           |           |

**Table S23** B3LYP-D3/aug-cc-pVTZ optimized cartesian coordinates (Å), zero point correction and total energy of HONO–DMA–H<sub>2</sub>O (E).

|                       |                   |           |           |
|-----------------------|-------------------|-----------|-----------|
| O                     | -0.976763         | -1.228223 | 0.041425  |
| H                     | -0.040060         | -0.760156 | 0.009115  |
| O                     | -3.000181         | -0.573567 | 0.032828  |
| N                     | -1.869677         | -0.216885 | 0.004305  |
| N                     | 1.378292          | -0.046186 | -0.034521 |
| H                     | 1.141706          | 0.927997  | -0.203267 |
| C                     | 2.039116          | -0.165793 | 1.268389  |
| H                     | 1.411930          | 0.289404  | 2.032875  |
| H                     | 2.170580          | -1.220124 | 1.513945  |
| H                     | 3.022437          | 0.317149  | 1.285767  |
| C                     | 2.184495          | -0.564673 | -1.142592 |
| H                     | 2.332580          | -1.637319 | -1.013475 |
| H                     | 1.656482          | -0.404268 | -2.081292 |
| H                     | 3.168843          | -0.087383 | -1.205272 |
| O                     | -0.381697         | 2.307146  | -0.130350 |
| H                     | -1.072239         | 1.622281  | -0.097037 |
| H                     | -0.825097         | 3.133867  | -0.335844 |
| Total energy:         | -417.5202591 a.u. |           |           |
| Zero point correction | 0.138764 a.u.     |           |           |

**Table S24** B3LYP-D3/aug-cc-pVTZ optimized cartesian coordinates (Å), zero point correction and total energy of HONO–DMA–H<sub>2</sub>O (F).

|                       |                   |           |           |
|-----------------------|-------------------|-----------|-----------|
| O                     | 0.651068          | -0.577063 | -3.596214 |
| H                     | 1.247408          | -0.366907 | -2.804845 |
| O                     | -0.807678         | -0.580330 | -2.021190 |
| N                     | -0.630181         | -0.715297 | -3.194925 |
| N                     | 0.720516          | 0.048304  | 0.603232  |
| H                     | -0.130147         | 0.336747  | 0.134559  |
| C                     | 0.990107          | 0.920090  | 1.745232  |
| H                     | 1.017327          | 1.958847  | 1.417408  |
| H                     | 0.242868          | 0.825037  | 2.543131  |
| H                     | 1.964964          | 0.671539  | 2.166925  |
| C                     | 0.601867          | -1.365184 | 0.968612  |
| H                     | -0.153389         | -1.542287 | 1.743974  |
| H                     | 0.338564          | -1.941369 | 0.083857  |
| H                     | 1.563220          | -1.722992 | 1.338856  |
| O                     | 2.334324          | -0.042579 | -1.592442 |
| H                     | 2.926302          | 0.708599  | -1.683676 |
| H                     | 1.817701          | 0.080498  | -0.740811 |
| Total energy:         | -417.5176626 a.u. |           |           |
| Zero point correction | 0.139229 a.u.     |           |           |

**Table S25** B3LYP-D3/aug-cc-pVTZ optimized cartesian coordinates (Å), zero point correction and total energy of HONO–DMA–H<sub>2</sub>O (G).

|                       |                   |           |           |
|-----------------------|-------------------|-----------|-----------|
| O                     | -0.964227         | -1.465355 | -0.481731 |
| H                     | 0.248299          | -0.612951 | -0.269710 |
| O                     | -1.989665         | 0.193694  | 0.379717  |
| N                     | -2.045494         | -0.984248 | -0.022385 |
| N                     | 1.153377          | -0.018033 | -0.042359 |
| H                     | 0.899817          | 0.928343  | -0.365086 |
| C                     | 1.302693          | 0.006412  | 1.429904  |
| H                     | 0.372453          | 0.374321  | 1.854944  |
| H                     | 1.486860          | -1.005599 | 1.783858  |
| H                     | 2.128092          | 0.655603  | 1.715619  |
| C                     | 2.318610          | -0.549666 | -0.774624 |
| H                     | 2.492767          | -1.578899 | -0.468464 |
| H                     | 2.105578          | -0.527304 | -1.840681 |
| H                     | 3.204829          | 0.047303  | -0.564903 |
| O                     | -0.370804         | 2.225346  | -0.409601 |
| H                     | -1.059727         | 1.561067  | -0.164230 |
| H                     | -0.764400         | 2.804129  | -1.066902 |
| Total energy:         | -417.5203318 a.u. |           |           |
| Zero point correction | 0.140145 a.u.     |           |           |

**Table S26** B3LYP-D3/aug-cc-pVTZ optimized cartesian coordinates (Å), zero point correction and total energy of *cis*-HONO.

|                       |                   |           |          |
|-----------------------|-------------------|-----------|----------|
| O                     | 1.092010          | 0.065411  | 0.000000 |
| N                     | -0.174455         | -0.517982 | 0.000000 |
| O                     | -1.058379         | 0.258521  | 0.000000 |
| H                     | 0.952141          | 1.034419  | 0.000000 |
| Total energy:         | -205.7910382 a.u. |           |          |
| Zero point correction | 0.019973 a.u.     |           |          |

**Table S27** B3LYP-D3/aug-cc-pVTZ optimized cartesian coordinates (Å), zero point correction and total energy of *trans*-HONO.

|                       |                   |           |          |
|-----------------------|-------------------|-----------|----------|
| O                     | -0.890196         | -0.605345 | 0.000000 |
| N                     | 0.000000          | 0.519339  | 0.000000 |
| O                     | 1.110612          | 0.174199  | 0.000000 |
| H                     | -1.763329         | -0.186202 | 0.000000 |
| Total energy:         | -205.7921852 a.u. |           |          |
| Zero point correction | 0.020085 a.u.     |           |          |

**Table S28** B3LYP-D3/aug-cc-pVTZ optimized cartesian coordinates (Å), zero point correction and total energy of H<sub>2</sub>O.

|                       |                  |           |          |
|-----------------------|------------------|-----------|----------|
| O                     | 0.000000         | 0.116983  | 0.000000 |
| H                     | 0.763571         | -0.467933 | 0.000000 |
| H                     | -0.763571        | -0.467933 | 0.000000 |
| Total energy:         | -76.4662067 a.u. |           |          |
| Zero point correction | 0.021237 a.u.    |           |          |

**Table S29** B3LYP-D3/aug-cc-pVTZ optimized cartesian coordinates (Å), zero point correction and total energy of DMA.

|                       |                   |           |           |
|-----------------------|-------------------|-----------|-----------|
| C                     | 1.215244          | -0.222479 | 0.020081  |
| H                     | 2.087742          | 0.425764  | -0.060713 |
| H                     | 1.269904          | -0.761034 | 0.979752  |
| H                     | 1.278261          | -0.965314 | -0.777860 |
| C                     | -1.215243         | -0.222479 | 0.020081  |
| H                     | 0.000000          | 1.340438  | 0.498948  |
| H                     | -2.087742         | 0.425764  | -0.060711 |
| H                     | -1.278262         | -0.965312 | -0.777861 |
| H                     | -1.269903         | -0.761035 | 0.979751  |
| N                     | 0.000000          | 0.561497  | -0.146040 |
| Total energy:         | -135.2262358 a.u. |           |           |
| Zero point correction | 0.092031 a.u.     |           |           |
